# Supplementary material
Source: PubMed Central journal article supplement (PMC6176188)
Supplement: ajcr0008-1837-f5.pdf [file ajcr0008-1837-f5.pdf]

## 2-DG reduces PD-L1 expression in TNBC

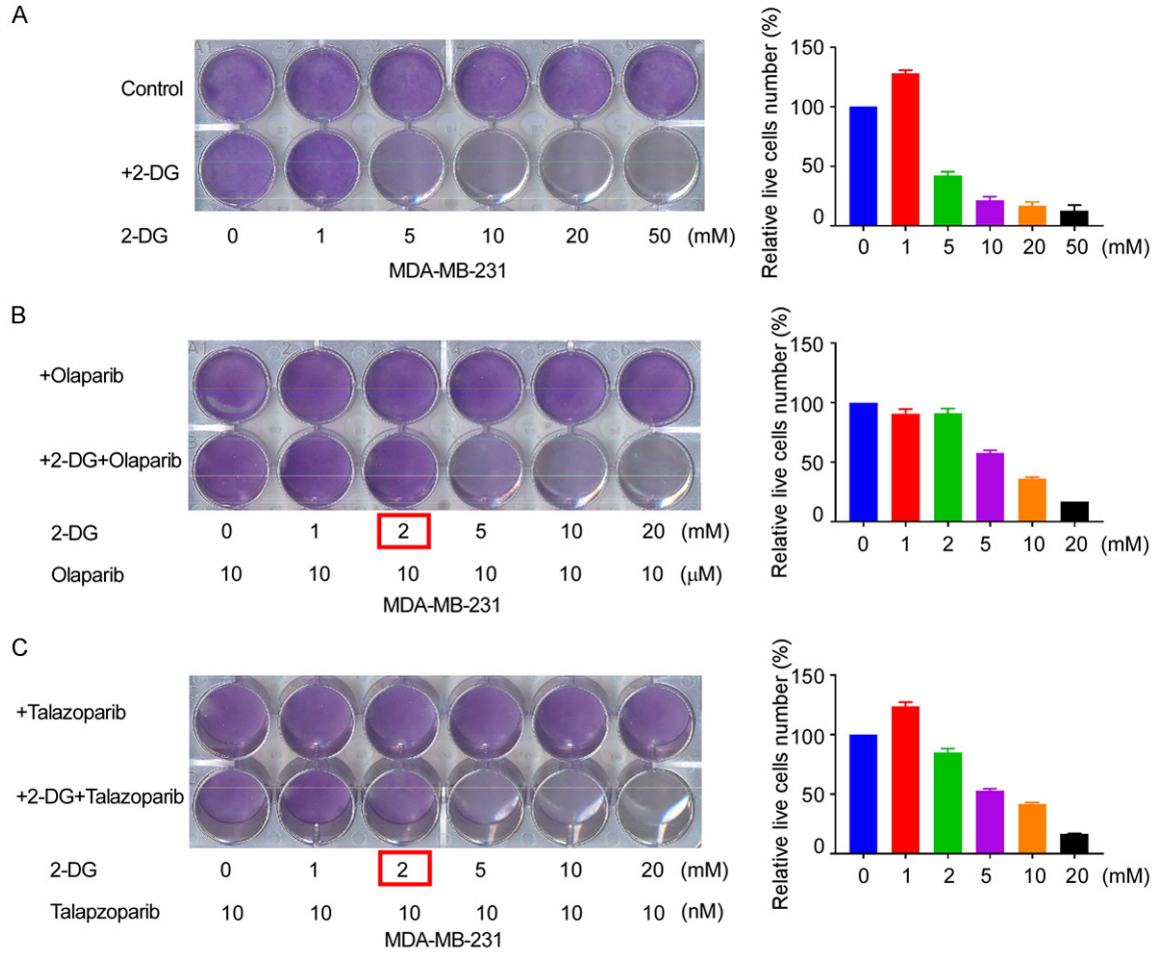

**Figure S1.** Identifying the 2-DG concentration that does not significantly affect cell growth. A. MDA-MB-231 cells were treated with 1, 5, 10, 20, or 50 mmol/L 2-DG for 48 hours. Left, the cells were stained with crystal violet. Right, the percentage of live cells observed at 48 hours (normalized to the control group). B. MDA-MB-231 cells were treated with 10 μmol/L olaparib and/or 1, 2, 5, or 10 mmol/L 2-DG for 48 hours. Left, the cells were stained with crystal violet. Right, The percentage of live cells at 48 hours (normalized to the control group). C. MDA-MB-231 cells were treated with 10 nmol/L talazoparib and/or 1, 2, 5, or 10 mmol/L 2-DG for 48 hours. Left, cells were stained with crystal violet. Right, The percentage of live cells at 48 hours (normalized to the control group).
